# Supplementary material
Source: HighWire-hosted journal article supplement (https://innovations.bmj.com/highwire/filestream/139089/field_highwire_adjunct_files/0/bmjinnov-2021-000928supp001_data_supplement.pdf)
Supplement: bmjinnov-2021-000928supp001_data_supplement.pdf [file bmjinnov-2021-000928supp001_data_supplement.pdf]

## Brief impact assessment of Qatar Foundation's Ability Friendly Programme

1. Have you noticed any positive changes in your child's development during the time of their participation in the Ability Friendly Program?
  - Yes, I've noticed positive changes
  - No, I've noticed no positive changes in my child's development
  - I've noticed negative changes in my child's development
  - I've noticed both positive and negative changes in my child's development
  
2. If you have noticed positive change, how would you describe it?
  - Significantly positive change
  - Moderately positive change
  - Minimally positive change
  - Not applicable- I've seen no positive changes
  
3. If you have noticed positive changes, which (if any) of these statements reflects these changes?
  - My child is more communicative
  - My child is more active at home
  - My child has more self confidence
  - My child has developed new friendships
  - My child is more relaxed following the Ability Friendly sessions
  - My child engages more in other activities
  - Other (please specify)
  
4. As the primary caregiver for your child, have you developed any new friendships as a result of the Ability Friendly sessions?
  - Yes
  - No
  
5. As the primary caregiver for your child, do the Ability Friendly sessions provide you with respite care/time that you would not otherwise enjoy?
  - Yes
  - No
  
6. Would you recommend the Ability Friendly sessions to other parents of children with special needs?
  - Yes
  - No
